# Supplementary material for: Phage Paride can kill dormant, antibiotic-tolerant cells of Pseudomonas aeruginosa by direct lytic replication
Source: PubMed Central journal article supplement (PMC10761892; doi:10.1038/s41467-023-44157-3), 2024-01-02
Supplement: 41467_2023_44157_MOESM1_ESM.pdf [file 41467_2023_44157_MOESM1_ESM.pdf]

## *E. coli* cultures

a

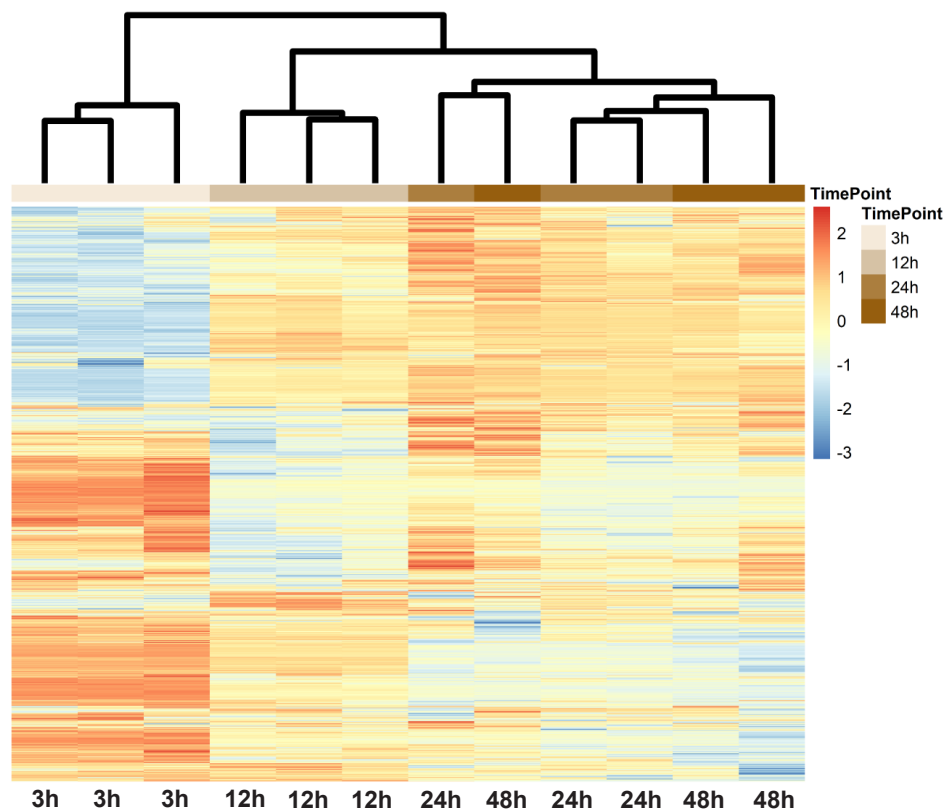

b

## *P. aeruginosa* cultures

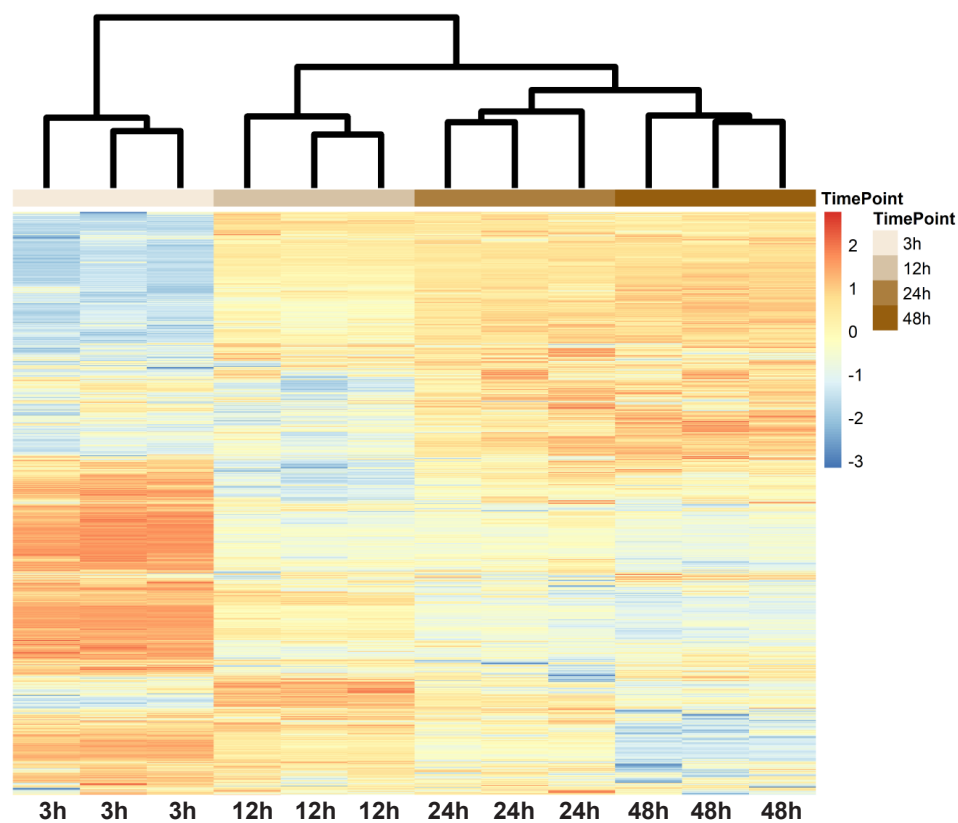

**Figure S1: Whole proteomes of *E. coli* and *P. aeruginosa* at various growth stages.**

Heatmaps of the total proteomes of *E. coli* K-12 MG1655 (a) and *P. aeruginosa*  $\Delta pel \Delta psl$  (b) sampled at 3, 12, 24, and 48h of growth in M9Glc. The dendrograms (top) indicate how the proteomes from different time points cluster together. Colors (blue to red) on the heatmaps indicate the log<sub>2</sub> intensity of the mean-centered MS signals for each protein detected. The data indicate a clear progression of the proteomic profiles from the earliest (light brown, growing bacteria) to the latest time point (dark brown; deep dormancy 48h after subculturing). In this culture setup, the bacteria reach stationary phase (maximal optical density at 600nm wavelength) after ca. eight hours as shown in our previous work<sup>1</sup>. All data are available in public repositories (see *Data Availability*).

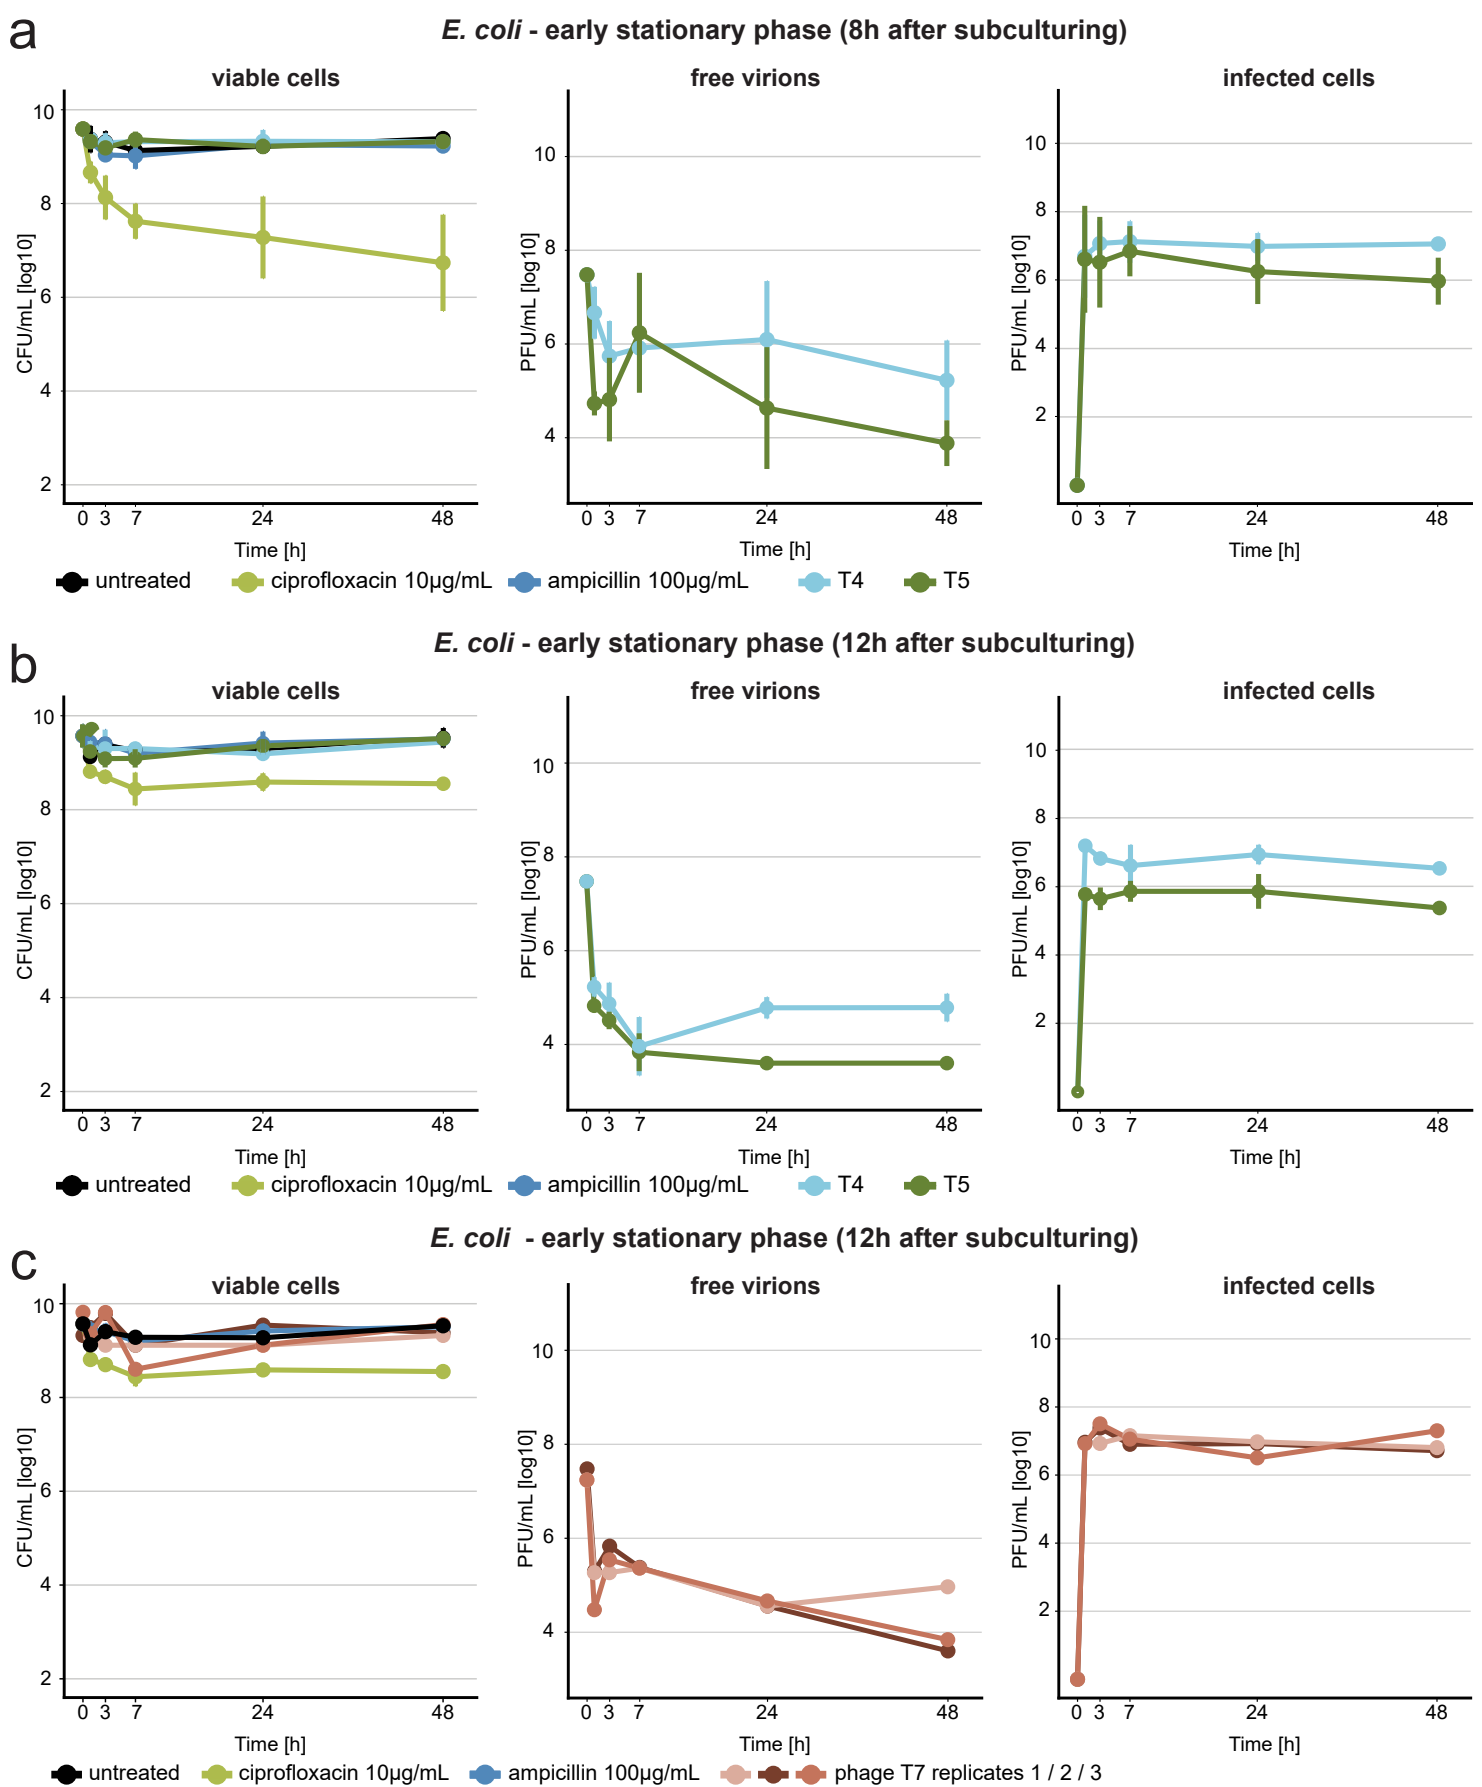

**Figure S2: Time-kill curves of early stationary phase *E. coli*.**

(a-c) *E. coli* K-12 MG1655 cultured for 8h or 12h after subculturing were challenged with antibiotics or phages (MOI  $\approx$  0.01) and viable cells (CFU/ml) as well as plaque-forming units (PFU/ml) of free virions and infected cells were recorded over time. Data points and error bars show the average of three biological replicates and standard error of the mean, with the exception of (c) where the individual replicates of the experiments performed with phage T7 are shown (matching Fig. 2a). Limits of detection are 2 log<sub>10</sub> CFU/mL for viable cells, 3.6 log<sub>10</sub> PFU/mL for free virions and 2.6 log<sub>10</sub> PFU/mL for infected cells. Source data are provided as a Source Data file.

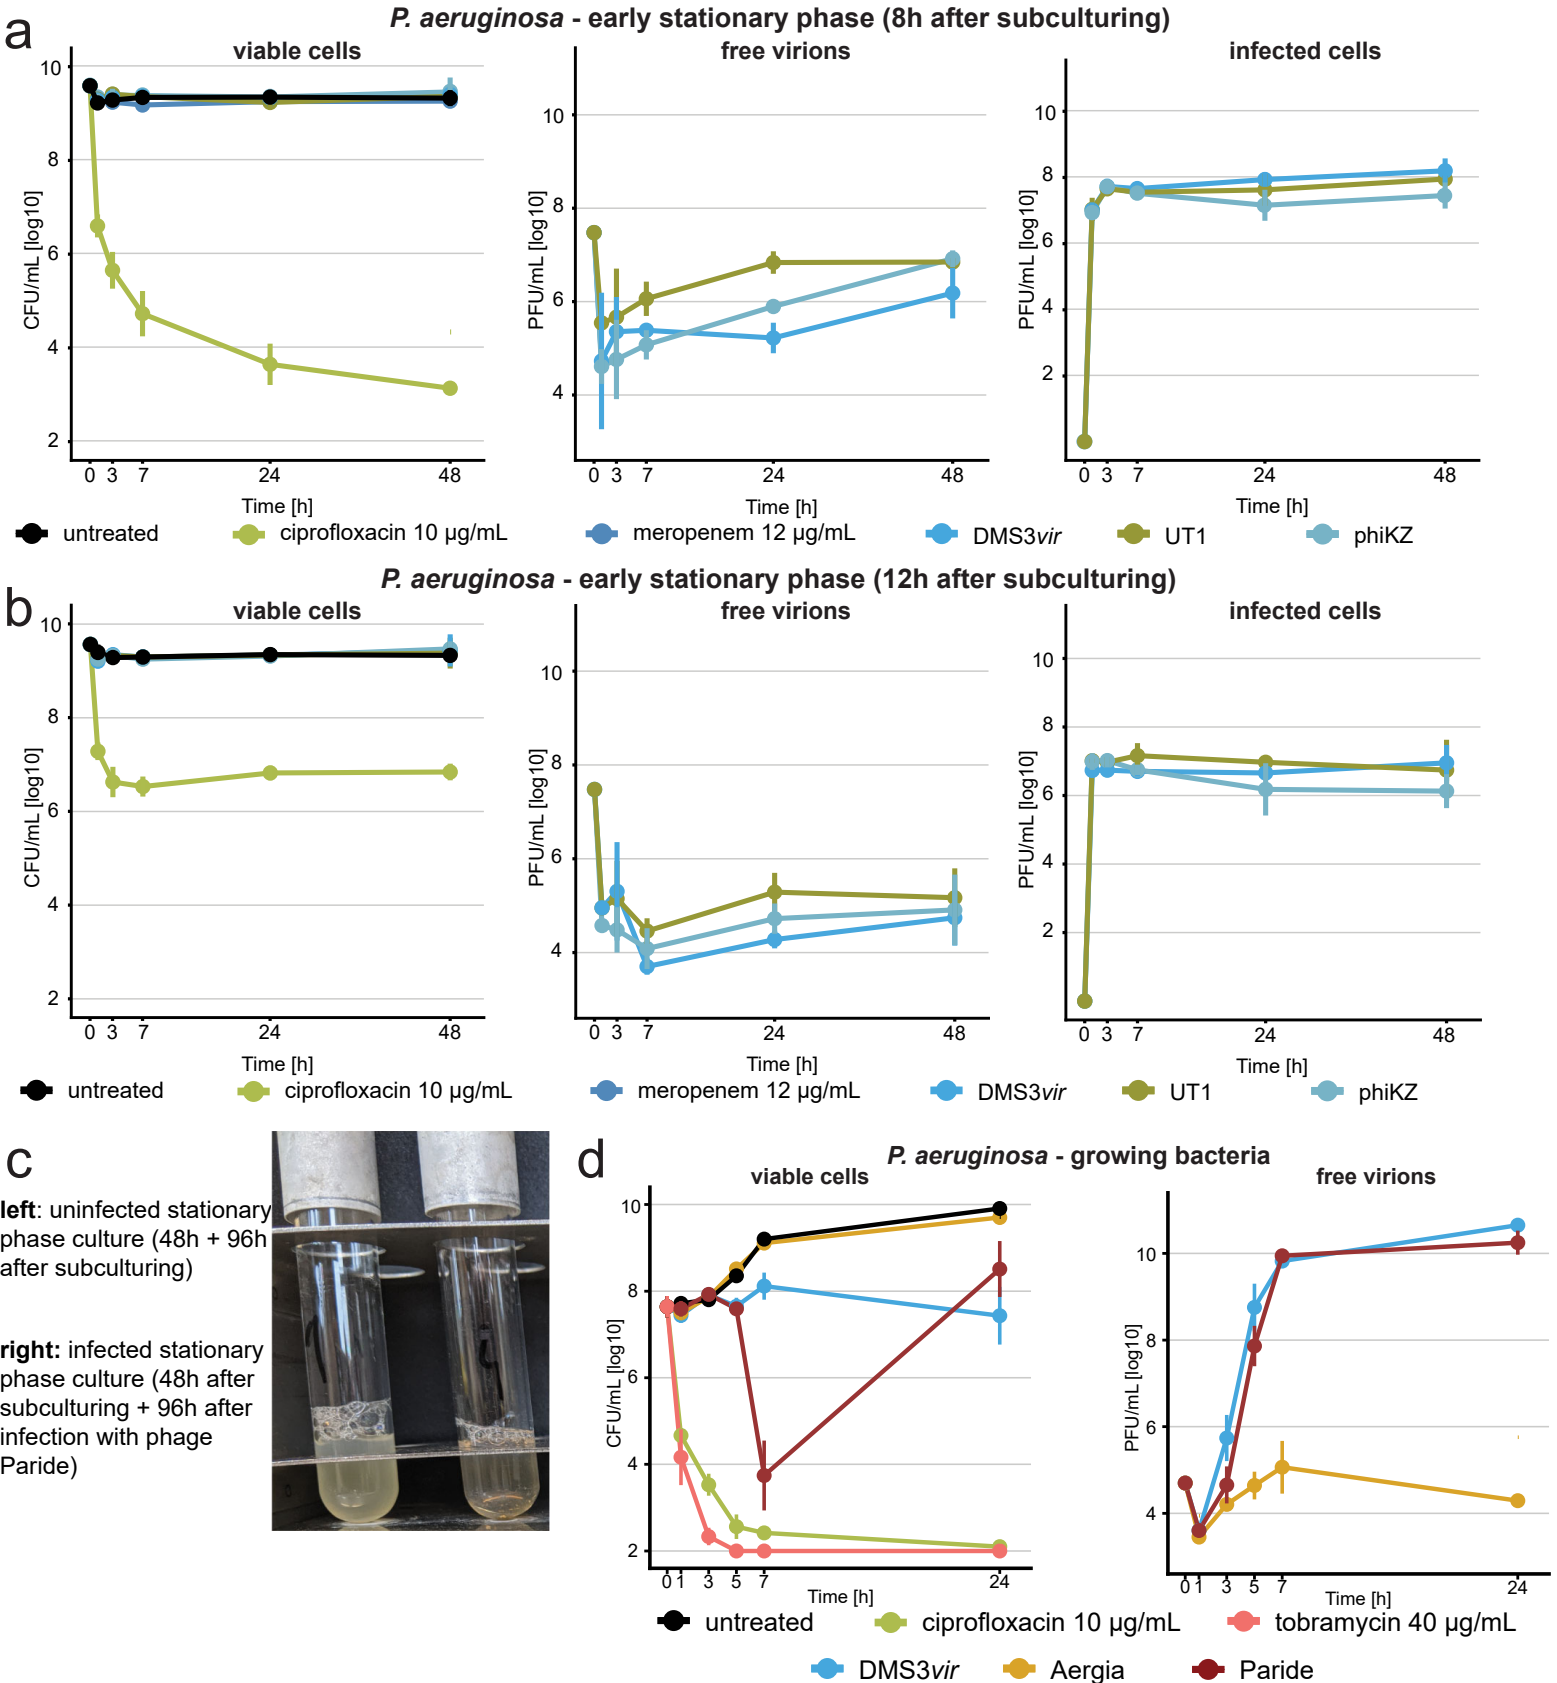

**Figure S3: Time-kill curves of early stationary phase *P. aeruginosa*, infection of regularly growing *P. aeruginosa* with Paride and lysis of deep-dormant cultures by the same phage.**

(a-b) *P. aeruginosa*  $\Delta pel \Delta psl$  cultured for 8 or 12h after subculturing were challenged with antibiotics or phages (MOI  $\approx 0.01$ ) and viable cells (CFU/ml) as well as plaque-forming units (PFU/ml) of free virions and infected cells were recorded over time. (c) Representative picture of a deep-dormant *P. aeruginosa* culture at 96h after infection with Paride in M9Glc (right) and untreated control (left). (d) Regularly growing cultures of *P. aeruginosa* were treated with antibiotics or phages (MOI  $\approx 0.001$ ) and viable CFU/ml as well as free phages were recorded over time. Data points represent the average of three independent experiments and error bars show their standard error of the mean. Limits of detection are 2 log<sub>10</sub> CFU/mL for viable cells, 3.6 log<sub>10</sub> PFU/mL for free phages and 2.6 log<sub>10</sub> PFU/mL for infected cells. Source data are provided as a Source Data file.

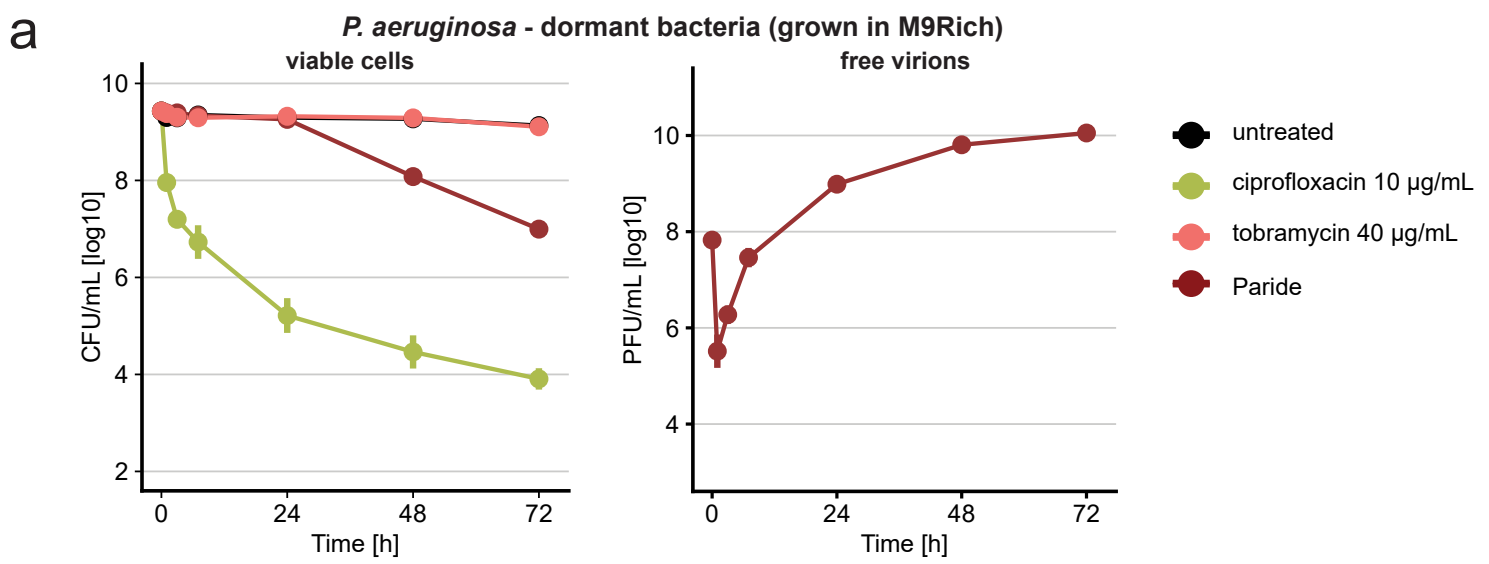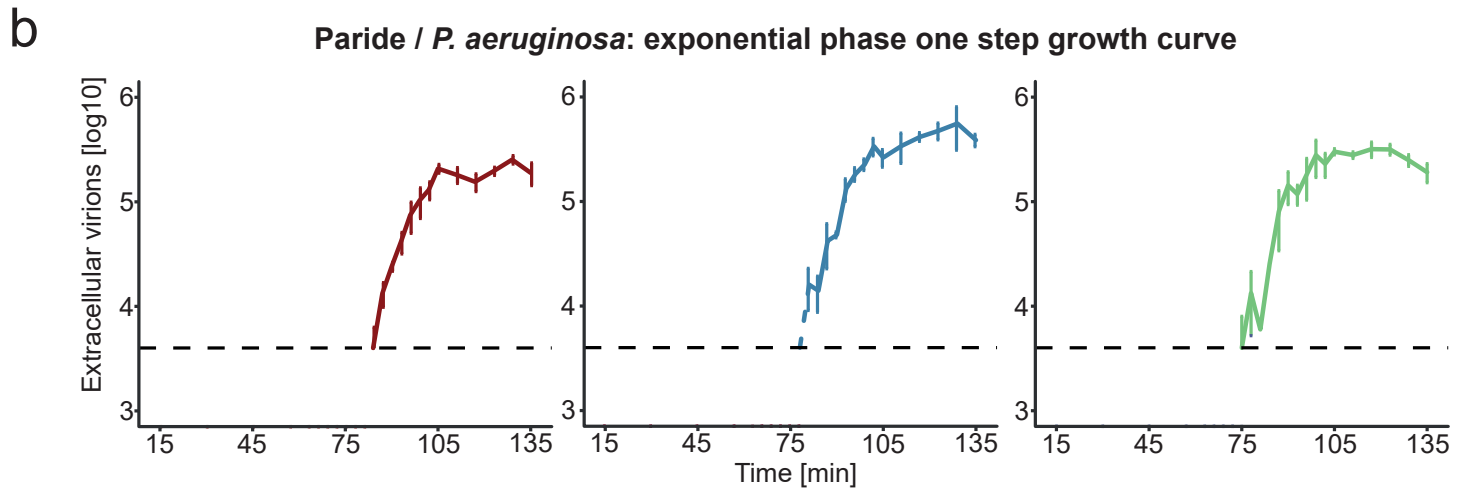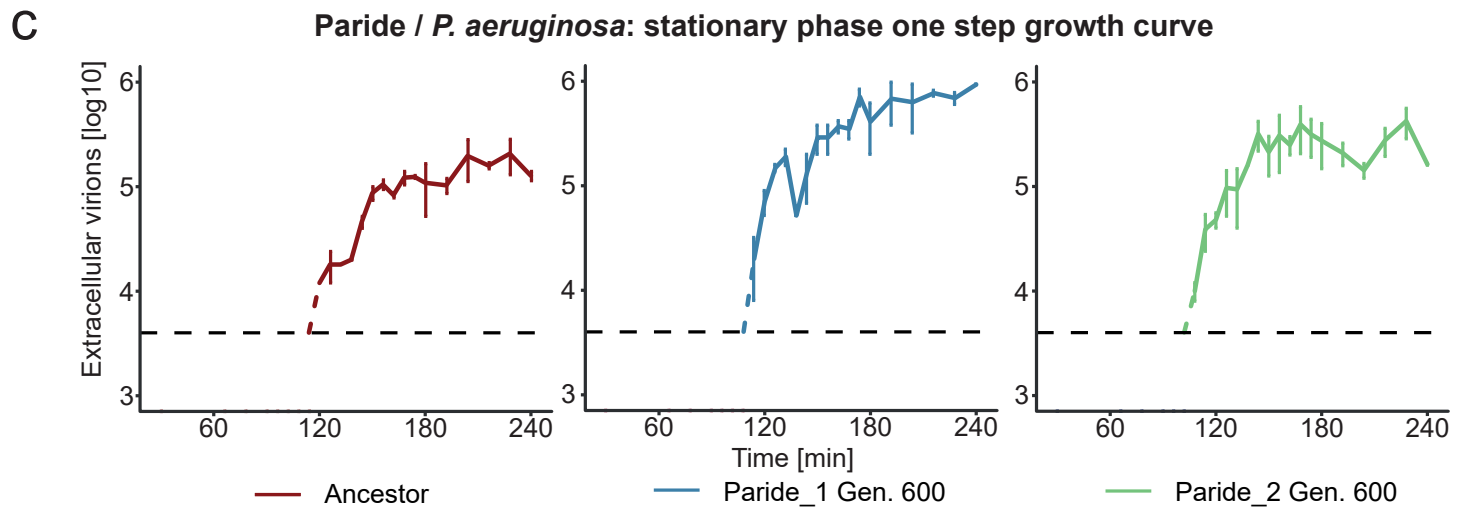

**Figure S4: Stationary phase time-kill curves of *P. aeruginosa* in M9Rich and one step growth curves of Paride.**

(a) Deep-dormant cultures of *P. aeruginosa*  $\Delta pel \Delta psl$  grown in M9Rich were treated with antibiotics or phages (MOI  $\approx 0.01$ ) and viable CFU/ml as well as free phages were recorded over time. Data points represent the average of three independent experiments and error bars show their standard error of the mean. Limits of detection are 2 log<sub>10</sub> CFU/mL for viable cells, 3.6 log<sub>10</sub> PFU/mL for free virions and 2.6 log<sub>10</sub> PFU/mL for infected cells. (b, c) Free virions of one-step growth experiments with ancestral Paride and two lineages evolved on deep-dormant cultures for ca. 600 generations were recorded over time in fast-growing cultures (b) and stationary phase cultures (c). Data points represent the average of six (regularly growing) and two (stationary phase) independent experiments, respectively. The dashed line represents the limit of detection (3.6 log<sub>10</sub> PFU/mL). Source data are provided as a Source Data file.

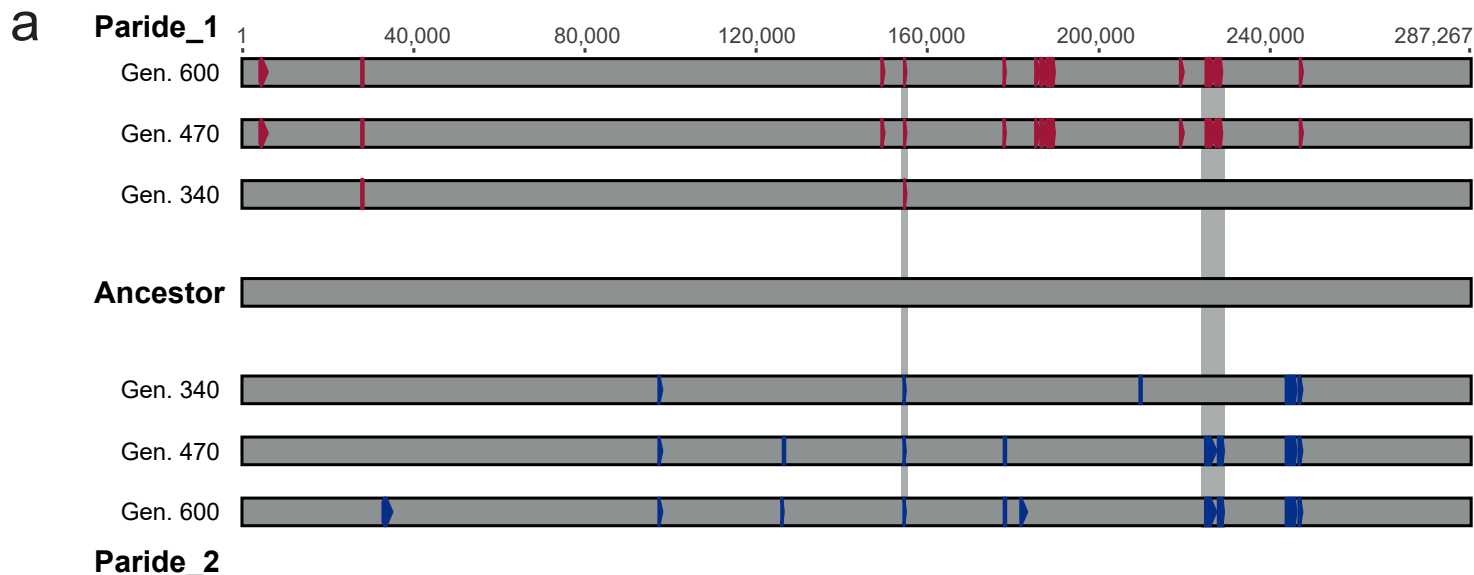

**b**

| Location (Ancestor) | Annotation                                                 | Mutation                                                                  | Potential Identity/Function                                     | First observation |               |
|---------------------|------------------------------------------------------------|---------------------------------------------------------------------------|-----------------------------------------------------------------|-------------------|---------------|
|                     |                                                            |                                                                           |                                                                 | Paride_1          | Paride_2      |
| 5'379               | Portal (connector) protein                                 | Synonymous SNP<br>C→T                                                     | Portal connector or vertex protein                              | 470 gen.          | -             |
| 28'409              | Intergenic space                                           | G→A                                                                       | -                                                               | 340 gen.          | -             |
| 33'455              | rIIA lysis inhibitor                                       | Single bp deleted → ~90% truncated                                        | rIIA protein                                                    | -                 | 600 gen.      |
| 97'875              | FtsH-interacting integral membrane protein                 | Non-synonymous SNP<br>C→T (Thr→Ile)                                       | -                                                               | -                 | 340 gen.      |
| 126'471             | Structural protein                                         | Non-coding SNPs (470 gen.)<br>Deletion (502 bp; 600 gen.)                 | Collar protein                                                  | -                 | 600 gen.      |
| 150'220             | Hypothetical protein                                       | Single bp insertion → frameshift alters a few residues and truncates by 6 | Isomerase or oxidoreductase, aligns to UDP-glucose-4-epimerases | 470 gen.          | -             |
| 155'004             | Intergenic space directly upstream of hypothetical protein | SNP A→G (ATA ATG.. to ATG ATG..)                                          | -                                                               | 340 gen.          | 340 gen.      |
| 178'493             | Hypothetical protein                                       | Synonymous SNP<br>A→G                                                     | -                                                               | 470 gen.          | -             |
| 178'650             | Intergenic space upstream of hypothetical protein          | A→G                                                                       | -                                                               | -                 | 470 gen.      |
| 183'289             | ATPase                                                     | Non-synonymous SNP<br>T→C (Ser→Pro)                                       | AAA+ ATPase / protease                                          | -                 | 600 gen.      |
| 186'457             | Multiple genes without specific annotation                 | Deletion (3'277bp)                                                        | -                                                               | 470 gen.          | -             |
| 210'329             | Intergenic region                                          | Deletion of duplicated region (67bp)                                      | -                                                               | -                 | Only 340 gen. |
| 219'823             | Structural protein                                         | Non-synonymous SNP<br>C→A (Gln→Lys)                                       | -                                                               | 470 gen.          | -             |
| 225'313             | Multiple genes                                             | Deletion (3'758bp)                                                        | -                                                               | 470 gen.          | -             |
| 225'398             |                                                            | Deletion (4'209bp)                                                        |                                                                 | -                 | 470 gen.      |
| 244'531             | Multiple genes without specific annotation                 | Deletion (4'284bp)                                                        | -                                                               | -                 | 340 gen.      |
| 247'901             | Hypothetical Protein                                       | Synonymous SNP<br>C→T                                                     | -                                                               | 470 gen.          | -             |

**Figure S5: Comparative genomics of evolved Paride lineages and mutation analysis.**

(a) Schematic genome alignment of Paride\_1 and Paride\_2 lineages from clones sampled at different time points (after ca. 340, 470, and 600 generations of evolution). Grey bars highlight spots where the same or similar mutations have been detected. (b) Full list of mutations identified in the two evolved Paride lineages. Possible biological functions of mutated genes have been inferred from the genome annotation. The table also indicates the first detection of each mutation with respect to the three clones that have been sequenced sequentially for each lineage. All data are shown directly in this illustration.

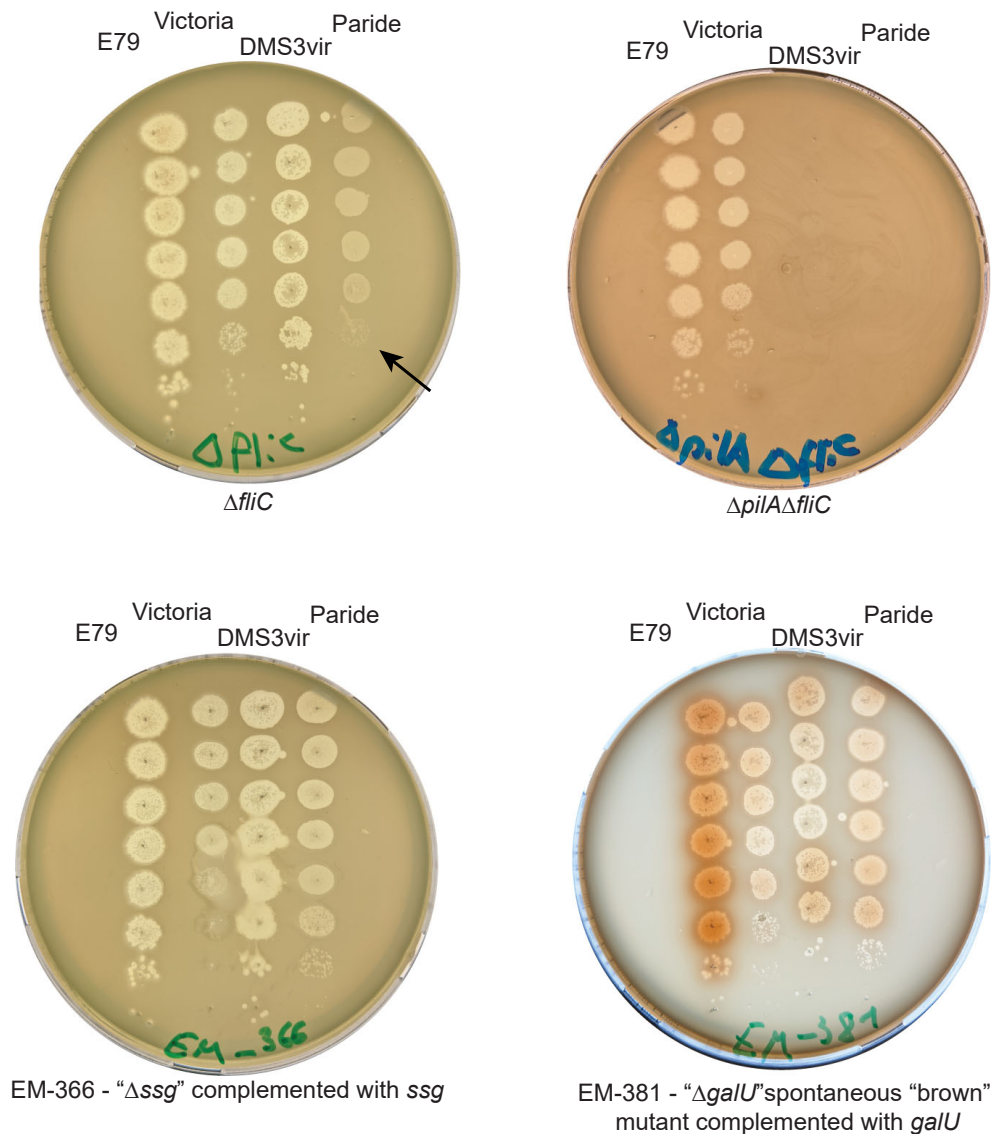

**Figure S6: Top agar assays with Paride and control phages on different surface receptor mutants of *P. aeruginosa* PAO1.**

Top agars were set up with *P. aeruginosa* PAO1  $\Delta pel \Delta psl$  mutants lacking functional expression of one or more surface receptor genes before infection with serial dilutions of phage Paride and control phages E79 (targeting the LPS core; see Meadow & Wells, *Microbiology* (1978)<sup>2</sup>), newly isolated phage Victoria (targeting the LPS O antigen), and DMS3vir (targeting type IV pili; see Budzik et al., *J Bacteriol* (2004)<sup>3</sup>). Arrows highlight opaque plaque formation of phage Paride on several mutants. Strain EM-366 is a spontaneously isolated mutant with a single nucleotide deletion which inactivates the *ssg* gene complemented with the same gene *in cis*. Strain EM-381 is a spontaneously isolated "brown mutant" as described previously with a large deletion around *galU* (Markwitz et al., *ISME J* (2022)<sup>4</sup>) complemented with *galU in cis*. The data are summarized in Table S2. Top agar plates are representatives of at least three independent replicates.

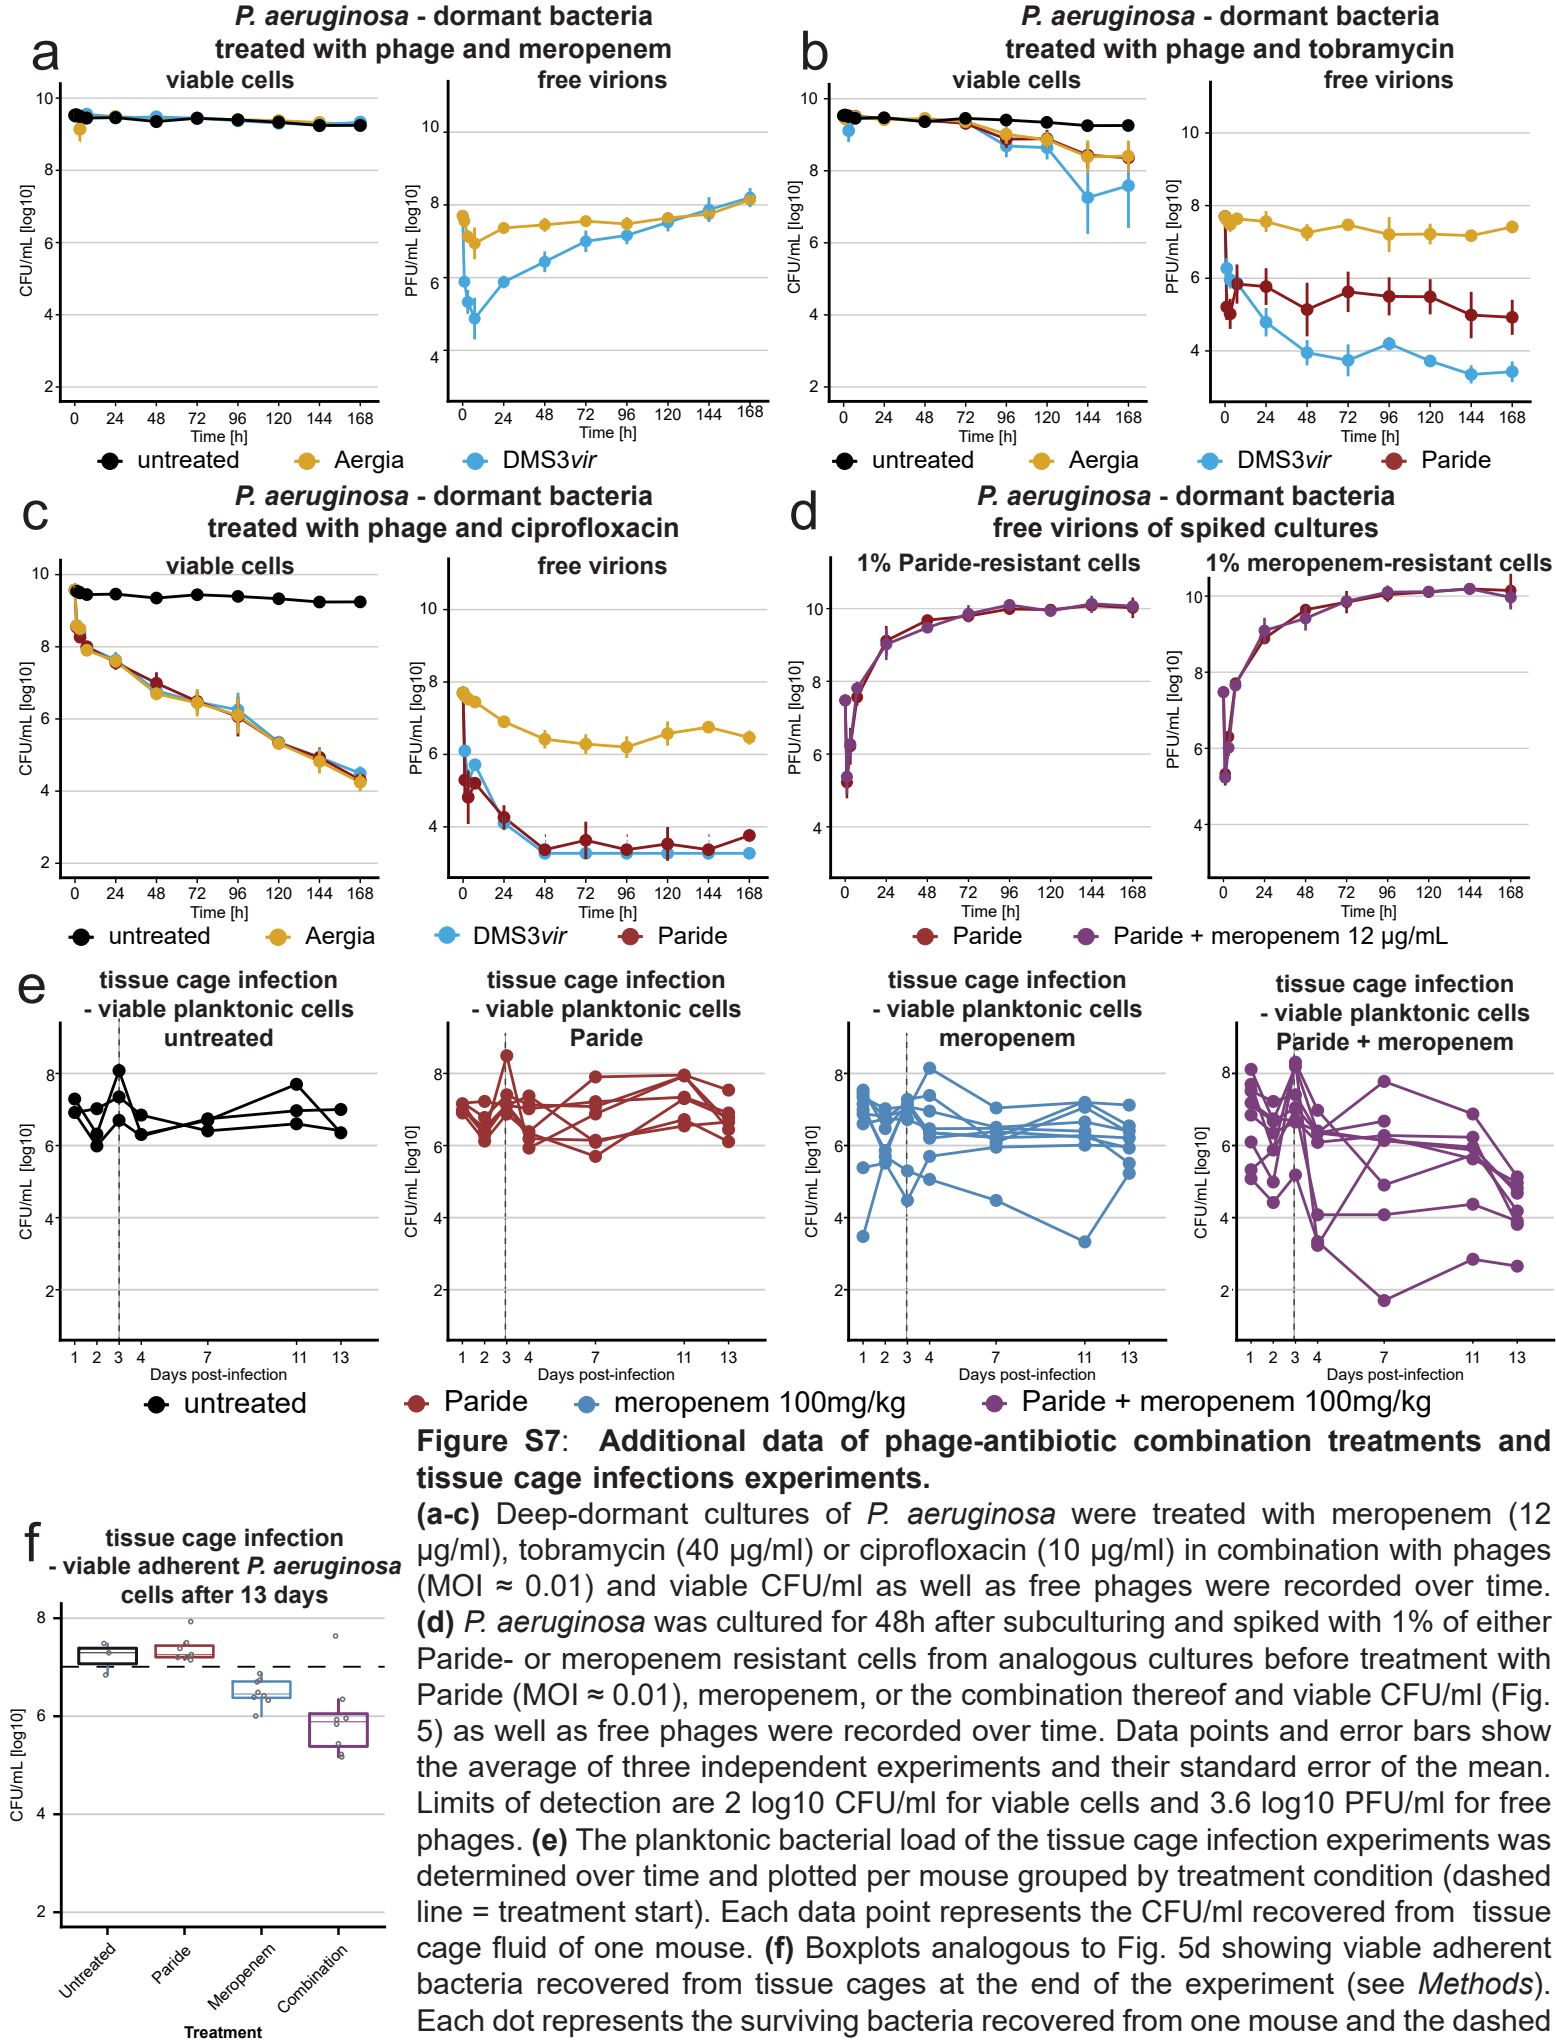

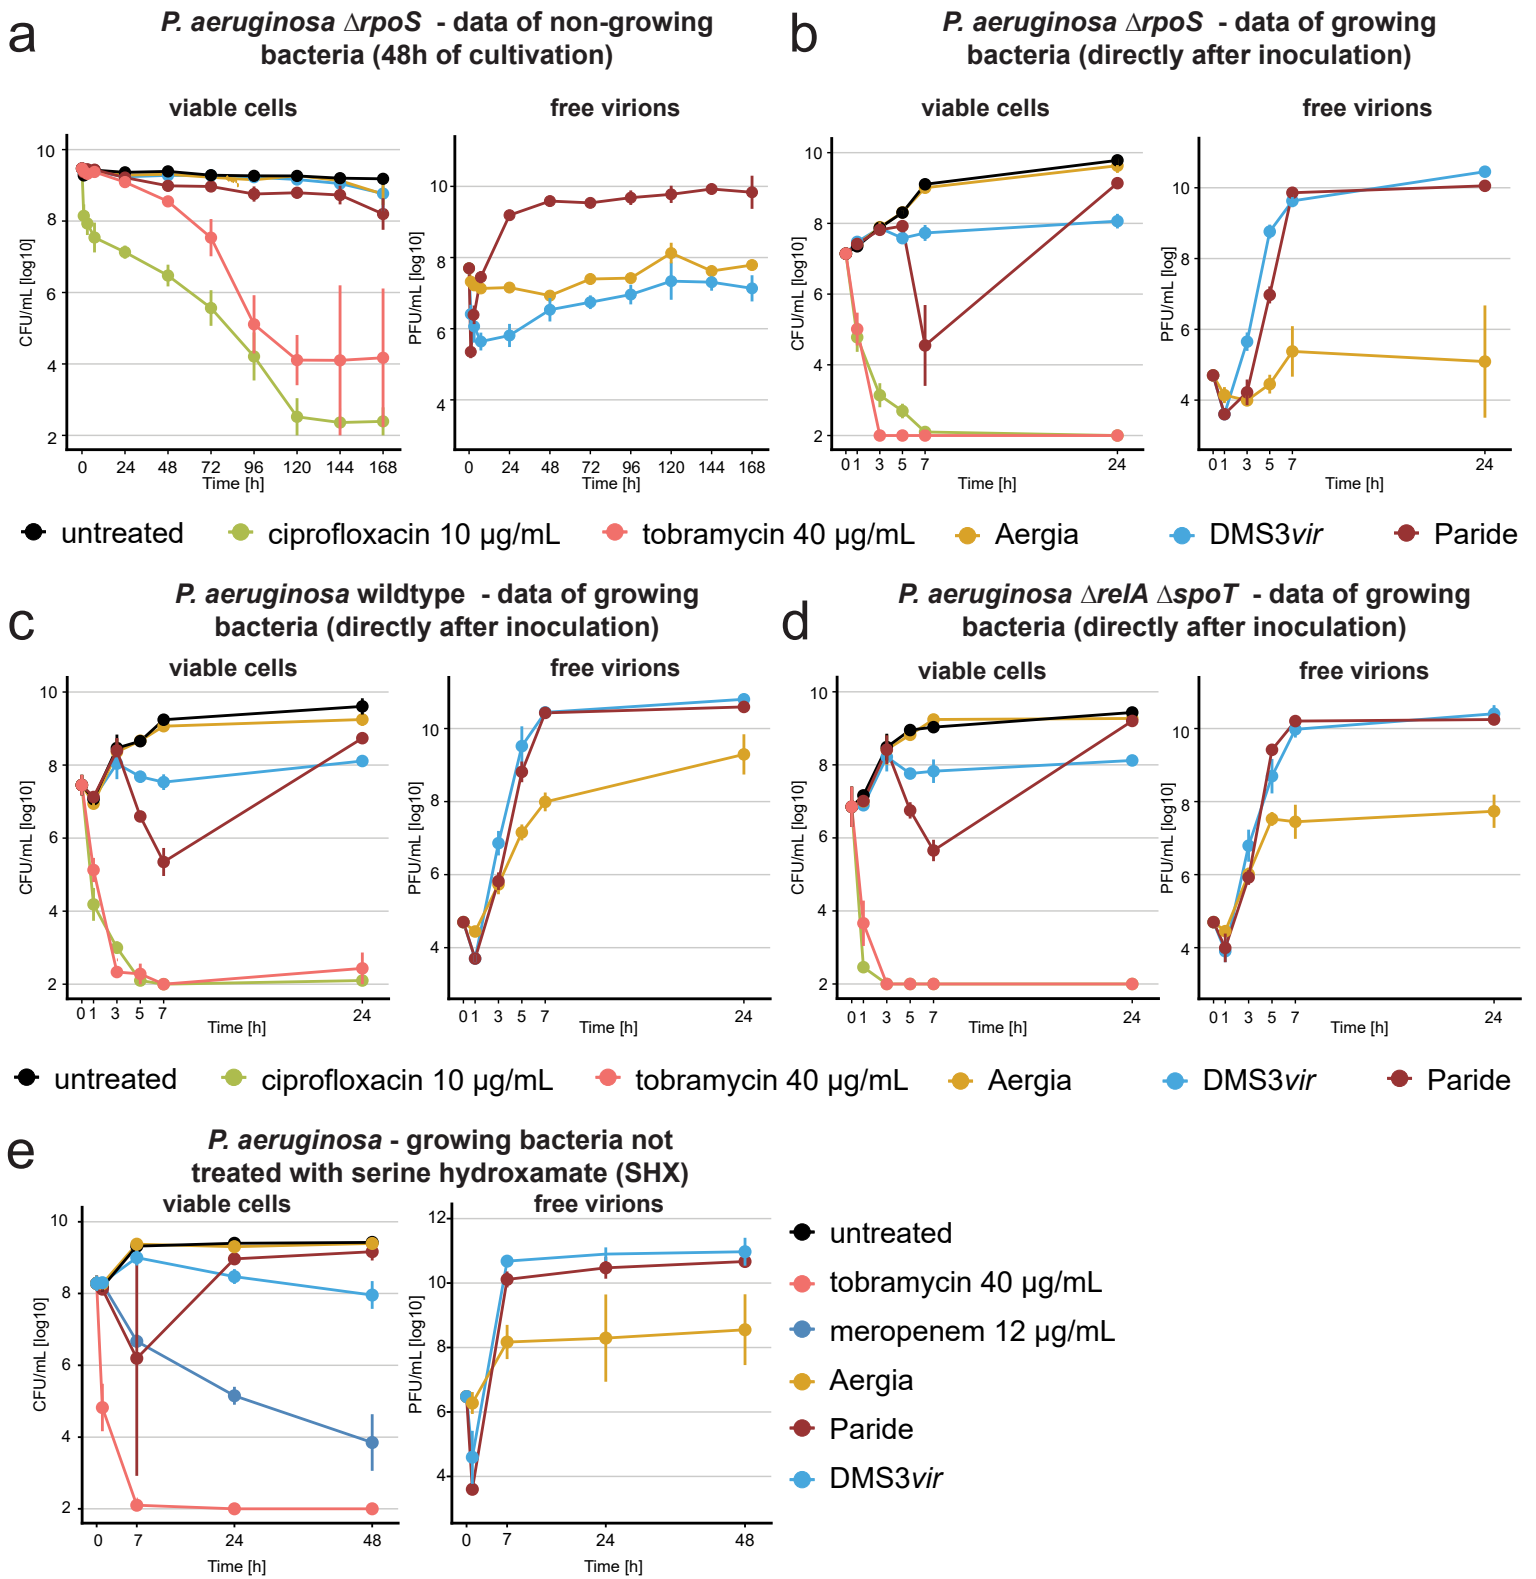

**Figure S8: Additional data regarding Paride infections of  $\Delta rpoS$  and  $\Delta relA \Delta spoT$  mutants as well as in presence of SHX.**

(a) Deep-dormant cultures of *P. aeruginosa* PAO1  $\Delta pel \Delta psI$  (wildtype) and its  $\Delta rpoS$  derivative both grown in M9Glc were treated with antibiotics or phages (MOI  $\approx 0.01$ ) and viable CFU/ml as well as free phages were recorded over time. (b) Fast-growing cultures of *P. aeruginosa* PAO1  $\Delta pel \Delta psI$  (wildtype) and its  $\Delta rpoS$  derivative both grown in M9Glc were treated with antibiotics or phages (MOI  $\approx 0.001$ ) and viable CFU/ml as well as free phages were recorded over time. (c,d) Fast-growing cultures of *P. aeruginosa* PAO1  $\Delta pel \Delta psI$  (wildtype) and its  $\Delta relA \Delta spoT$  derivative both grown in M9Rich were treated with antibiotics or phages (MOI  $\approx 0.001$ ) and viable CFU/ml as well as free phages were recorded over time. (e) Growing cultures of *P. aeruginosa* were processed as described for the SHX treatment shown in Fig. 6c (as a control without SHX) and then challenged with antibiotics or phages (MOI  $\approx 0.01$ ). Viable CFU/ml as well as free phages were recorded over time. Data points and error bars show the average of three biological replicates and standard error of the mean. Limits of detection are 2 log<sub>10</sub> CFU/mL for viable cells, 3.6 log<sub>10</sub> PFU/mL for free phages. Source data are provided as a Source Data file.



Table S1 – Bacteriophages used in this study

| Common name | Systematic name         | Host                       | Isolation source                                        | Reference                                                                                                                           |
|-------------|-------------------------|----------------------------|---------------------------------------------------------|-------------------------------------------------------------------------------------------------------------------------------------|
| T4          | vB_EcoM_T4              | <i>E. coli</i> K-12 MG1655 | NA                                                      | our laboratory collection                                                                                                           |
| Bas37       | vB_EcoM_KarlGJung       | <i>E. coli</i> K-12 MG1655 | NA                                                      | Maffei, Shaidullina, et al., <i>PLoS Biology</i> (2021) <sup>5</sup>                                                                |
| T5          | vB_EcoS_T5              | <i>E. coli</i> K-12 MG1655 | NA                                                      | our laboratory collection                                                                                                           |
| Bas27       | vB_EcoS_TrudiGerster    | <i>E. coli</i> K-12 MG1655 | NA                                                      | Maffei, Shaidullina, et al., <i>PLoS Biology</i> (2021) <sup>5</sup>                                                                |
| T7          | vB_EcoP_T7              | <i>E. coli</i> K-12 MG1655 | NA                                                      | our laboratory collection                                                                                                           |
| Bas07       | vB_EcoS_JakobBernoulli  | <i>E. coli</i> K-12 MG1655 | NA                                                      | Maffei, Shaidullina, et al., <i>PLoS Biology</i> (2021) <sup>5</sup>                                                                |
| Bas08       | vB_EcoS_DanielBernoulli | <i>E. coli</i> K-12 MG1655 | NA                                                      | Maffei, Shaidullina, et al., <i>PLoS Biology</i> (2021) <sup>5</sup>                                                                |
| Bas54       | vB_EcoM_MaxBurger       | <i>E. coli</i> K-12 MG1655 | NA                                                      | Maffei, Shaidullina, et al., <i>PLoS Biology</i> (2021) <sup>5</sup>                                                                |
| Bas60       | vB_EcoM_PaulScherrer    | <i>E. coli</i> K-12 MG1655 | NA                                                      | Maffei, Shaidullina, et al., <i>PLoS Biology</i> (2021) <sup>5</sup>                                                                |
| DMS3vir     | vB_PaeS_DMS3vir         | <i>P. aeruginosa</i> PAO1  | NA                                                      | Budzik et al., <i>J Bacteriol</i> (2004) <sup>3</sup>                                                                               |
| Aergia      | vB_PaeS_Aergia          | <i>P. aeruginosa</i> PAO1  | marsh sample (Sursee, CH; March 2019)                   | this study                                                                                                                          |
| Victoria    | vB_PaeM_Victoria        | <i>P. aeruginosa</i> PAO1  | sewage inflow (ARA Canius, Lenzerheide, CH; April 2019) | this study                                                                                                                          |
| UT1         | vB_PaeM_UT1             | <i>P. aeruginosa</i> PAO1  | NA                                                      | Schrader et al., <i>Can J Microbiol</i> (1997) <sup>6</sup> ; obtained from Prof. Tyler Kokjohn                                     |
| phiKZ       | vB_PaeM_phiKZ           | <i>P. aeruginosa</i> PAO1  | NA                                                      | Krylov and Zhazykov, <i>Genetika</i> (1978) <sup>7</sup> ; obtained from the Felix d'Herelle Reference Center for Bacterial Viruses |

|           |                   |                              |                                                                   |            |
|-----------|-------------------|------------------------------|-------------------------------------------------------------------|------------|
| Paride    | vB_PaeM_Paride    | <i>P. aeruginosa</i><br>PAO1 | rotting plant material from Hörnli cemetery (Basel, CH; May 2019) | this study |
| Ettore    | vB_PaeM_Ettore    | <i>P. aeruginosa</i><br>PAO1 | sewage inflow (ARA Basel, CH; March 2020)                         | this study |
| Deifobo   | vB_PaeM_Deifobo   | <i>P. aeruginosa</i><br>PAO1 | sewage inflow (ARA Basel, CH; October 2020)                       | this study |
| Cassandra | vB_PaeM_Cassandra | <i>P. aeruginosa</i><br>PAO1 | sewage inflow (ARA Basel, CH; February 2021)                      | this study |

Table S2 – Phage susceptibility of *P. aeruginosa* PAO1 surface receptor mutants

(+) – clear plaques, (+/-) opaque plaque, (-) reduced efficiency of plating, (--) loss of lytic activity

| Strain                                             | Phenotype                                                                                                                                                                            | E79 activity | Victoria activity | DMS3vir activity | Paride activity |
|----------------------------------------------------|--------------------------------------------------------------------------------------------------------------------------------------------------------------------------------------|--------------|-------------------|------------------|-----------------|
| PAO1                                               | PAO1 wildtype strain                                                                                                                                                                 | (+)          | (+)               | (+)              | (+)             |
| PAO1 $\Delta pel\Delta psl$                        | wildtype strain of this study                                                                                                                                                        | (+)          | (+)               | (+)              | (+)             |
| PAO1 $\Delta pilA$                                 | lack of type IV pili                                                                                                                                                                 | (+)          | (+)               | (--)             | (+/-)           |
| PAO1 $\DeltafliC$                                  | lack of flagella                                                                                                                                                                     | (+)          | (+)               | (+)              | (+/-)           |
| PAO1 $\Delta pel\Delta psl \Delta pilA \DeltafliC$ | lack of type IV pili and lack of flagella                                                                                                                                            | (+)          | (+)               | (--)             | (--)            |
| PAO1 $\Delta pel\Delta psl \Delta wpbL$            | lack of glucosyltransferase WbpL essential for the initiation of O-antigen synthesis                                                                                                 | (+)          | (--)              | (+)              | (+/-)           |
| PAO1 $\Delta pel\Delta psl \Delta galU$            | lack of uridylyltransferase GalU essential for the synthesis of LPS and O-antigen precursors                                                                                         | (--)         | (--)              | (+)              | (--)            |
| PAO1 $\Delta pel\Delta psl \Delta ssg$             | lack of glucosyltransferase Ssg (PA5001) essential for the synthesis of O-antigen                                                                                                    | (--)         | (--)              | (+)              | (--)            |
| PAO1 $\Delta pel\Delta psl$ “EM-095”               | spontaneous mutant resistant to Paride with a (GGC → G-C deletion at position 5’618’713 that causes a frameshift in <i>ssg</i> (PA5001)                                              | (--)         | (--)              | (+)              | (--)            |
| PAO1 $\Delta pel\Delta psl$ “EM-307”               | spontaneous mutant with “brown” phenotype resistant to Paride; carries a deletion of 44’015bp between positions 2’198’124-2’230’850 and 2’231’737-2’242’134 encompassing <i>galU</i> | (--)         | (--)              | (+)              | (--)            |
| PAO1 $\Delta pel\Delta psl$ “EM-366”               | EM-095 complemented with SC101miniTn7-Gm-Plac PA5001 ( <i>ssg</i> )                                                                                                                  | (+)          | (+)               | (+)              | (+)             |
| PAO1 $\Delta pel\Delta psl$ “EM-381”               | EM-307 complemented with SC101miniTn7-Gm-Plac <i>galU</i>                                                                                                                            | (+)          | (+)               | (+)              | (+)             |

Phage E79 is known to depend on structures in the LPS core of *P. aeruginosa* PAO1 (Meadow and Wells, *Microbiology* (1978)<sup>2</sup>) while phage DMS3vir targets type IV pili (Budzik et al., *J Bacteriol*

(2004)<sup>3</sup>). Newly isolated phage Victoria requires expression of the LPS O-antigen of *P. aeruginosa* PAO1 as evidenced by loss of lytic activity on a *wbpL* knockout. Base pair coordinates refer to the *P. aeruginosa* PAO1 reference genome (NCBI GenBank accession AE004091).

Table S3 - Strains used in this study

| Strains                                              | Description                                                                                                                                                                                                                                                                                                                                                                                     | Reference                                                     |
|------------------------------------------------------|-------------------------------------------------------------------------------------------------------------------------------------------------------------------------------------------------------------------------------------------------------------------------------------------------------------------------------------------------------------------------------------------------|---------------------------------------------------------------|
| <i>E. coli</i> K-12<br>MG1655                        | laboratory wildtype strain of <i>E. coli</i>                                                                                                                                                                                                                                                                                                                                                    | our laboratory collection                                     |
| <i>P. aeruginosa</i><br>PAO1                         | parental strain of all <i>P. aeruginosa</i> PAO1 strains used in this study                                                                                                                                                                                                                                                                                                                     | our laboratory collection                                     |
| PAO1 <i>hsdR17</i>                                   | phage isolation strain of <i>P. aeruginosa</i> PAO1 where the <i>hsdR</i> component of the <i>hsdRMS</i> system was inactivated; the strain is otherwise of wildtype genotype with functional <i>pel</i> and <i>psl</i> loci                                                                                                                                                                    | this study                                                    |
| PAO1 $\Delta pel \Delta psl$                         | strain with reduced biofilm formation, used as wildtype strain for all experiments unless stated otherwise                                                                                                                                                                                                                                                                                      | Broder et al., <i>Nat Microbiol</i> (2016) <sup>8</sup>       |
| PAO1 $\Delta pel \Delta psl \Delta relA \Delta spoT$ | strain lacking the (p)ppGpp producing and degrading enzymes RelA and SpoT                                                                                                                                                                                                                                                                                                                       | this study                                                    |
| PAO1 $\Delta pel \Delta psl \Delta rpoS$             | strain lacking the RpoS sigma factor                                                                                                                                                                                                                                                                                                                                                            | this study                                                    |
| PAO1 $\Delta pel \Delta psl \Delta wbpL$             | strain lacking the glycosyltransferase WbpL essential for O-antigen biosynthesis initiation                                                                                                                                                                                                                                                                                                     | this study                                                    |
| PAO1 $\Delta pel \Delta psl \Delta galU$             | strain lacking the uridylyltransferase GalU essential for the biosynthesis of LPS and O-antigen precursors                                                                                                                                                                                                                                                                                      | this study                                                    |
| PAO1 $\Delta pilA$                                   | strain lacking the major pilin PilA, unable to assemble type IV pili                                                                                                                                                                                                                                                                                                                            | Laventie et al., <i>Cell Host Microbe</i> (2019) <sup>9</sup> |
| PAO1 $\Delta fliC$                                   | strain lacking the flagellin FliC, unable to assemble flagella                                                                                                                                                                                                                                                                                                                                  | Laventie et al., <i>Cell Host Microbe</i> (2019) <sup>9</sup> |
| PAO1 $\Delta pel \Delta psl \Delta pilA \Delta fliC$ | strain lacking PilA and FliC, unable to assemble pili and flagella                                                                                                                                                                                                                                                                                                                              | Jenal lab collection                                          |
| PAO1 $\Delta pel \Delta psl$<br>“EM-095”             | spontaneous mutant resistant to Paride carrying a point deletion at position 5’618’713 (GGC →G-C) in the PA5001 gene causing a frameshift; this gene codes for Ssg, an enzyme involved in LPS core biosynthesis (see <i>Methods</i> ), strongly suggesting that this structure is part of the host receptor used by Paride; this mutant was isolated as a survivor of a deep-dormancy infection | this study                                                    |
| PAO1 $\Delta pel \Delta psl$<br>“EM-307”             | spontaneous mutant with “brown” phenotype resistant to Paride carrying a deletion of 44’015bp between positions 2’198’124-2’230’850 and 2’231’737-2’242’134 around <i>galU</i>                                                                                                                                                                                                                  | this study                                                    |
| PAO1 $\Delta pel \Delta psl$<br>“EM-366”             | EM-095 complemented with SC101miniTn7-Gm-Plac PA5001/ <i>ssg</i>                                                                                                                                                                                                                                                                                                                                | this study                                                    |
| PAO1 $\Delta pel \Delta psl$<br>“EM-381”             | EM-307 complemented with SC101miniTn7-Gm-Plac <i>galU</i>                                                                                                                                                                                                                                                                                                                                       | this study                                                    |
| PAO1 $\Delta pel \Delta psl$<br>“EM-429”             | wildtype strain transformed with mCTX::ev                                                                                                                                                                                                                                                                                                                                                       | this study                                                    |

|                                                                             |                                                                                                                                                                                                                                                                                        |            |
|-----------------------------------------------------------------------------|----------------------------------------------------------------------------------------------------------------------------------------------------------------------------------------------------------------------------------------------------------------------------------------|------------|
| PAO1 $\Delta pel\Delta psl$<br>“EM-430”                                     | wildtype strain transformed with pUC18miniTn7::ev                                                                                                                                                                                                                                      | this study |
| PAO1 $\Delta pel\Delta psl$<br>“EM-431”                                     | “EM-095” transformed with mCTX::ev                                                                                                                                                                                                                                                     | this study |
| 401190-12 –<br>Pseaer “EM-460”                                              | clinical isolate used as template for the generation of EM-497                                                                                                                                                                                                                         | this study |
| PAO1 $\Delta pel\Delta psl$<br><i>oprD</i> <i>CI</i> <i>NDM</i><br>“EM-497” | strain engineered to have high meropenem resistance (see Table S7); it carries an inactivating mutation in the <i>oprD</i> gene (involved in meropenem import) and was transformed with SC101miniTn7 encoding a constitutively expressed NDM $\beta$ -lactamase amplified from EM-460; | this study |
| PAO1 $\DeltapscC$<br>“EM-358”                                               | strain lacking PscC, an essential structural component of the type III secretion system                                                                                                                                                                                                | this study |

Base pair coordinates refer to the *P. aeruginosa* PAO1 reference genome (NCBI GenBank accession AE004091).

Table S4 – Oligonucleotide primers used in this study

| Primers  | Description                                                       | Sequence 5'->3'                                    |
|----------|-------------------------------------------------------------------|----------------------------------------------------|
| prAH2057 | Linearisation of pFOGG vector                                     | CATAAAGTGTAAGCCTGGGG                               |
| prAH2058 | Linearisation of pFOGG vector                                     | GCTATCTGGACAAGGGAAAAC                              |
| prAH2079 | Shuttling primers from pEX18-Tc to pFOGG                          | TTGCGTTTTCCCTTGTCCAGATAGCCCAGTCACGACG<br>TTGTAAAAC |
| prAH2283 | Shuttling primers from pEX18-Tc to pFOGG                          | GGCACCCCAGGCTTTACACTTTATGCAGGAAACAGC<br>TATGACCATG |
| prEM0028 | To amplify <i>hsdR</i> insert                                     | CGCCATTCTAGACTCATCGAAGCCGGTGACGAATT                |
| prEM0029 | To amplify <i>hsdR</i> insert                                     | CGCCAGGAGCTCAACTCGACAATAAGCCGGGCAAG                |
| prEM0005 | To introduce M353(ATG->TGA) stop mutation in <i>hsdR</i> sequence | TGCGGTCACAAAGGGTTCGGCTACGCTG                       |
| prEM0006 | To introduce M353(ATG->TGA) stop mutation in <i>hsdR</i> sequence | CTTTGTGACCGCAGTTCGATTCCATCATC                      |
| prEM0013 | Verification of <i>hsdR17</i> mutation                            | ATCGCTGGCCAACATCATCG                               |
| prEM0014 | Verification of <i>hsdR17</i> mutation                            | GTGCGCCTCGTCGATCAATA                               |
| prEM0135 | Verification of <i>relA</i> deletion                              | GTGACTGGCAACTGACTCTGG                              |
| prEM0136 | Verification of <i>relA</i> deletion                              | GATCGACCTTGAGATGCCG                                |
| prEM0070 | Verification of <i>spoT</i> deletion                              | GTCTTCGGCAACCTCTACGGCA                             |
| prEM0071 | Verification of <i>spoT</i> deletion                              | GTCGTCGCCATAGAAGGCAACC                             |
| prEM0072 | Verification of <i>rpoS</i> deletion                              | AGTTAGTACGTCGGTACCTGC                              |
| prEM0073 | Verification of <i>rpoS</i> deletion                              | AACATCACCGAGAAGAAGGA                               |

|          |                                              |                                                      |
|----------|----------------------------------------------|------------------------------------------------------|
| prEM0312 | To amplify <i>galU</i> deletion insert       | TTGCGTTTTCCCTTGTCCAGATAGCCTACTCCTGGAT<br>CAGATGCGT   |
| prEM0313 | To amplify <i>galU</i> deletion insert       | CTCATGATCAAGAAGGCTCACTGAGCCTCGCC                     |
| prEM0314 | To amplify <i>galU</i> deletion insert       | CCTTCTTGATCATGAGAATCCTTCGACA                         |
| prEM0315 | To amplify <i>galU</i> deletion insert       | GGCACCCCAGGCTTTACACTTTATGTCGCCACCAAG<br>ATTCCTTCA    |
| prEM0316 | Verification of <i>galU</i> deletion         | CGATGACGAACAGATCGAAATC                               |
| prEM0317 | Verification of <i>galU</i> deletion         | AGTTCAGCAAGTACGCGGC                                  |
| prEM0059 | To amplify <i>wbpL</i> deletion insert       | TTGCGTTTTCCCTTGTCCAGATAGCGTTCCACCAGTT<br>GGGCTTG     |
| prEM0060 | To amplify <i>wbpL</i> deletion insert       | CGGGTTCCTTGGAAAAATCC                                 |
| prEM0061 | To amplify <i>wbpL</i> deletion insert       | GGCACCCCAGGCTTTACACTTTATGCGACCGCCTTT<br>GATCTATGC    |
| prEM0062 | To amplify <i>wbpL</i> deletion insert       | GCTTAGGATTTTTCCAAGGAACCCGCGCGATCATCC<br>AGATCATCAT   |
| prEM0066 | Verification of <i>wbpL</i> deletion         | CTTGTAGTTGATCTGCACACC                                |
| prEM0067 | Verification of <i>wbpL</i> deletion         | CTATGCCATCTCCAAATACG                                 |
| prEM0306 | To amplify PA5001 deletion insert            | TTGCGTTTTCCCTTGTCCAGATAGCTTCGATATAGAC<br>ATCTTCCAGGC |
| prEM0307 | To amplify PA5001 deletion insert            | CTGATGAAAGTTTTTACCTGAGAGTAGCAGCCG                    |
| prEM0308 | To amplify PA5001 deletion insert            | CTCTCAGGTAAAACTTTCATCAGACCTTCATCCTC                  |
| prEM0309 | To amplify PA5001 deletion insert            | GGCACCCCAGGCTTTACACTTTATGAACTGGGTTAT<br>TTCTGCCTGC   |
| prEM0310 | Verification of PA5001 deletion              | TTCTTGACGTATTGGTGGGAT                                |
| prEM0311 | Verification of PA5001 deletion              | GAGATCGAAACCGAGCATTAC                                |
| prEM0305 | To amplify PA5001 region for complementation | GGCGTTACCCAACCTTAATCGCCTTGAAGAATGCTCG<br>CCGTTGCT    |



|               |                                                                      |                                                   |
|---------------|----------------------------------------------------------------------|---------------------------------------------------|
| prEM0306      | To amplify PA5001 region for complementation                         | ATCCGCCAAAACAGGGAATTTATGCCTTTTCGGCTGCTACTCTCAGGT  |
| prEM0318      | To amplify <i>galU</i> region for complementation                    | GGCGTTACCCAACCTTAATCGCCTTGGTGACCGAGTGAAACAGTTCC   |
| prEM0319      | To amplify <i>galU</i> region for complementation                    | ATCCGCCAAAACAGGGAATTTATGCGTTTCGCCCCATACGAAAAACG   |
| prAH2376      | To linearise SC101-miniTn7-Gm- <i>Plac-QI</i>                        | GCATAAATTCCCTGTTTTGG                              |
| prAH2319      | To linearise SC101-miniTn7-Gm- <i>Plac-QI</i>                        | CAAGGCGATTAAGTTGGGTAA                             |
| prAH2381      | To amplify pUC18-miniTn7-Gm for <i>ori</i> exchange with SC101       | CACGTTAAGGGATTTTGGTC                              |
| prAH2382      | To amplify pUC18-miniTn7-Gm for <i>ori</i> exchange with SC101       | GGGTCATTATAGCGATTTTTTC                            |
| prAH2379      | To amplify SC101 <i>ori</i> to insert in linearized pUC18-miniTn7-Gm | ACCGAAAAAATCGCTATAATGACCCCTCCTGTTGATAGATCCAGTAATG |
| prAH2380      | To amplify SC101 <i>ori</i> to insert in linearized pUC18-miniTn7-Gm | CTCATGACCAAAAATCCCTTAACGTGCCGCTGTAACAAGTTGTCTC    |
| prAH2391<br>: | To linearise SC101-miniTn7-Gm for insertion of <i>Plac-lacIQ</i>     | GCACCCCAGGCTTTACACTTTATGCCTGAGTAGGACAAATCCGCC     |

|          |                                                                  |                                                     |
|----------|------------------------------------------------------------------|-----------------------------------------------------|
| prAH2371 | To linearise SC101-miniTn7-Gm for insertion of <i>Plac-lacIQ</i> | ACAGGAAGCAAAGCTGAAAGGAATCCGTTTAAGGG<br>CACCAATAACTG |
| prAH2201 | To exchange ATG to GTG of <i>sce-I</i> gene of pFOG              | AGAGAAAAGTGAAGTGCATCAAAAAAACCAGGTA                  |
| prAH2374 | To amplify <i>Plac-lacIQ</i> from pAH186SC101_e                  | GATTCCTTTCAGCTTTGCTTC                               |
| prAH2375 | To amplify <i>Plac-lacIQ</i> from pAH186SC101_e                  | GCATAAAGTGTAAGCCTGGG                                |
| prAH2202 | To exchange ATG to GTG of <i>sce-I</i> gene of pFOG              | TGCACTTCACTTTTCTCTATCACTGATAGG                      |
| prEM0336 | To amplify the NDM beta-lactamase and its promoter region        | GAATCCAAGCTAGACTGCGATGGACCCACATTCACC<br>CTGGC       |
| prEM0337 | To amplify the NDM beta-lactamase and its promoter region        | CGTTTAAGGGCACCAATAACTGTCAGCGCAGCTTGT<br>CGG         |
| prEM0345 | To amplify homology regions around <i>oprD</i>                   | TTGCGTTTTCCCTTGTCAGATAGCAAAGTCGCCGA<br>GCAACAGG     |
| prEM0346 | To amplify homology regions around <i>oprD</i>                   | CATCACTTTCATTGTGATTGCTCC                            |
| prEM0347 | To amplify the <i>oprD</i> allele of EM-460                      | GAGCAATCACAATGAAAGTGATG                             |
| prEM0348 | To amplify the <i>oprD</i> allele of EM-460                      | CGGTCGATTACAGGATCGACAGCG                            |
| prEM0349 | To amplify homology regions around <i>oprD</i>                   | CGCTGTCGATCCTGTAATCGACCG                            |

|          |                                                                  |                                                   |
|----------|------------------------------------------------------------------|---------------------------------------------------|
| prEM0350 | To amplify homology regions around <i>oprD</i>                   | GGCACCCCAGGCTTTACACTTTATGCATTTCCCTCGCG<br>GACGATG |
| prEM0324 | To screen for <i>oprD_CI</i> insertion                           | AAGAAGAAGACTAGCCGTCCTGC                           |
| prEM0325 | To screen for <i>oprD_CI</i> insertion                           | GTTTTTTCGTTGCCTGTGC                               |
| prEM0295 | To amplify upstream homology for deleting PA1716 ( <i>pscC</i> ) | TTGCGTTTTCCCTTGTCCAGATAGCGAATGTCTTCCA<br>TGCTCCGT |
| prEM0296 | To amplify upstream homology for deleting PA1716 ( <i>pscC</i> ) | CGCCGCCTGCTGAATTAGCATGGCCTGGAAGA                  |
| prEM0297 | To amplify upstream homology for deleting PA1716 ( <i>pscC</i> ) | GCCATGCTAATTCAGCAGGCGGCATCAGG                     |
| prEM0298 | To amplify upstream homology for deleting PA1716 ( <i>pscC</i> ) | GGCACCCCAGGCTTTACACTTTATGCAGGCGCGCAC<br>CCAGGAACA |
| prEM0299 | To verify deletion of PA1716 ( <i>pscC</i> )                     | GATAGCCGAATTTCTGCAGG                              |
| prEM0300 | To verify deletion of PA1716 ( <i>pscC</i> )                     | ACTGCGAGTCAAGTCCGAAT                              |
| prEM0177 | To linearize SC101miniTn7 Gm                                     | CATCGCAGTCTAGCTTGGATTC                            |
| prEM0178 | To linearize SC101miniTn7 Gm                                     | CAGTTATTGGTGCCCTTAAACG                            |

Table S5 - Plasmids used in this study

| Plasmid                           | Description                                                                                            | Reference                                                     |
|-----------------------------------|--------------------------------------------------------------------------------------------------------|---------------------------------------------------------------|
| pEX18-Tc                          | suicide vector for allelic exchange in <i>P. aeruginosa</i>                                            | Hoang et al., <i>Gene</i> (1998) <sup>20</sup>                |
| pEX18-Tc_ <i>hsdR17</i>           | suicide vector used to generate <i>hsdR17</i> mutation to inactivate <i>hsdR</i> of PAO1               | this study                                                    |
| pFOG                              | suicide vector for allelic exchange in <i>P. aeruginosa</i>                                            | Cianfanelli et al., <i>BMC Microbiol</i> (2020) <sup>11</sup> |
| pFOGG                             | variant of pFOG in which the ATG start codon of I-SceI has been replaced with GTG                      | this study                                                    |
| pFOGG_ <i>RelA</i>                | suicide vector used to generate <i>relA</i> deletion in PAO1                                           | this study                                                    |
| pFOGG_ <i>SpoT</i>                | suicide vector used to generate <i>spoT</i> deletion in PAO1                                           | this study                                                    |
| pFOGG_ <i>RpoS</i>                | suicide vector used to generate <i>rpoS</i> deletion in PAO1                                           | this study                                                    |
| pFOGG_ <i>GalU</i>                | suicide vector used to generate <i>galU</i> deletion in PAO1                                           | this study                                                    |
| pFOGG_ <i>WbpL</i>                | suicide vector used to generate <i>wbpL</i> deletion in PAO1                                           | this study                                                    |
| pFOGG_ PA5001/ <i>ssg</i>         | suicide vector used to generate <i>ssg</i> deletion in PAO1                                            | this study                                                    |
| pFOGG_ <i>oprD_CI</i>             | suicide vector used to introduce the <i>oprD_CI</i> allele of EM-490 into PAO1                         | this study                                                    |
| pFOGG_ <i>PscC</i>                | suicide vector used to generate <i>pscC</i> deletion in PAO1                                           | this study                                                    |
| SC101miniTn7-Gm-Plac_ <i>galU</i> | complementation of <i>galU</i> mutants                                                                 | this study                                                    |
| SC101miniTn7-Gm-Plac_ PA5001      | complementation of PA5001 mutant                                                                       | this study                                                    |
| SC101miniTn7-Gm_ NDM              | To introduce an NDM beta-lactamase and the 300bp upstream from the template strain (EM-460) into PAO1. | this study                                                    |
| pTNS2                             | Helper plasmid for transformation of miniTn7 based plasmids                                            | Choi et al., <i>Nat Methods</i> (2006) <sup>12</sup>          |
| pFLP2                             | FRT/FLP excising plasmid for removal of antibiotic cassette of miniTn7 based constructs                | Hoang et al., <i>Gene</i> (1998) <sup>10</sup>                |
| pUC18miniTn7_ ev                  | Empty plasmid used as control                                                                          | Choi et al., <i>Nat Methods</i> (2005) <sup>12</sup>          |
| miniCTX_ ev                       | Empty plasmid used as control                                                                          | Hoang et al., <i>Plasmid</i> (2000) <sup>13</sup>             |

### Table S6 – Minimum inhibitory concentrations of antibiotics for clinical isolates

Table S6. MIC values of tobramycin and ciprofloxacin for *P. aeruginosa* PAO1  $\Delta pel \Delta psl$ , CI249 and CI282 in M9Rich medium. The values reported are the average of two independent experiments.

| Strain                       | Tobramycin sulfate MIC<br>[ $\mu\text{g}/\text{mL}$ ] | Ciprofloxacin MIC<br>[ $\mu\text{g}/\text{mL}$ ] |
|------------------------------|-------------------------------------------------------|--------------------------------------------------|
| PAO1 $\Delta pel \Delta psl$ | 1                                                     | 0.125                                            |
| CI249                        | 2                                                     | 0.25                                             |
| CI282                        | >32                                                   | >4                                               |

### Table S7 – Minimum inhibitory concentration of meropenem for a resistant strain

Table S7. MIC values of *P. aeruginosa* PAO1  $\Delta pel \Delta psl$  and *P. aeruginosa* PAO1  $\Delta pel \Delta psl oprD_{CI} NDM$  in M9Glucose medium. The values are the average of two independent experiments.

| Strain                                     | Meropenem trihydrate<br>MIC [ $\mu\text{g/mL}$ ] |
|--------------------------------------------|--------------------------------------------------|
| PAO1 $\Delta pel \Delta psl$               | 0.5                                              |
| PAO1 $\Delta pel \Delta psl oprD_{CI} NDM$ | 8                                                |

## Supplementary Note 1 – interpretation of free virion PFU increase for phages infecting dormant *Pseudomonas aeruginosa* cultures

An interesting phenomenon observed with deep-dormant cultures is that some *Pseudomonas aeruginosa* phages seem to rapidly adsorb and enter hibernation after which the number of free virions increases again over the next days, but never above the inoculum (Fig. 1d, Fig. 2b). In the absence of evidence for viral replication or bacterial killing it seems evident that this phenomenon is caused by reversible adsorption of a subpopulation of phages that fail to irreversibly bind the terminal surface receptor and inject their genome. This would be reminiscent of *E. coli* phages T1 or phi80 that can only irreversibly bind their FhuA receptor and inject their genome when FhuA is energized by the TonB system<sup>14</sup>. However, the different phages showing this behaviour in our study bind to different receptors on the cell surface with phiKZ and DMS3*vir* targeting type IV pili while PB1-like phages like UT1 generally target the *P. aeruginosa* LPS<sup>4,15</sup>. Thus, this phenomenon could instead be caused by phenotypic resistance of a bacterial subpopulation to irreversible phage adsorption or by phenotypic heterogeneity on the phage side as observed previously in other contexts<sup>16</sup>.

## Supplementary References

- 1 Maffei, E., Fino, C. & Harms, A. Antibiotic Tolerance and Persistence Studied Throughout Bacterial Growth Phases. *Methods Mol Biol* **2357**, 23-40, doi:10.1007/978-1-0716-1621-5\_2 (2021).
- 2 Meadow, P. M. & Wells, P. L. Receptor Sites for R-type Pyocins and Bacteriophage E79 in the Core Part of the Lipopolysaccharide of *Pseudomonas aeruginosa* PAC1. *Microbiology* **108**, 339-343, doi:https://doi.org/10.1099/00221287-108-2-339 (1978).
- 3 Budzik, J. M., Rosche, W. A., Rietsch, A. & O'Toole, G. A. Isolation and characterization of a generalized transducing phage for *Pseudomonas aeruginosa* strains PAO1 and PA14. *J Bacteriol* **186**, 3270-3273, doi:10.1128/JB.186.10.3270-3273.2004 (2004).
- 4 Markwitz, P. *et al.* Genome-driven elucidation of phage-host interplay and impact of phage resistance evolution on bacterial fitness. *ISME J* **16**, 533-542, doi:10.1038/s41396-021-01096-5 (2022).
- 5 Maffei, E. *et al.* Systematic exploration of *Escherichia coli* phage-host interactions with the BASEL phage collection. *PLoS Biol* **19**, e3001424, doi:10.1371/journal.pbio.3001424 (2021).
- 6 Schrader, H. S. *et al.* Bacteriophage infection and multiplication occur in *Pseudomonas aeruginosa* starved for 5 years. *Can J Microbiol* **43**, 1157-1163 (1997).
- 7 Krylov, V. N. & Zhazykov, I. [Pseudomonas bacteriophage phiKZ--possible model for studying the genetic control of morphogenesis]. *Genetika* **14**, 678-685 (1978).
- 8 Broder, U. N., Jaeger, T. & Jenal, U. LadS is a calcium-responsive kinase that induces acute-to-chronic virulence switch in *Pseudomonas aeruginosa*. *Nat Microbiol* **2**, 16184, doi:10.1038/nmicrobiol.2016.184 (2016).
- 9 Laventie, B. J. *et al.* A Surface-Induced Asymmetric Program Promotes Tissue Colonization by *Pseudomonas aeruginosa*. *Cell Host Microbe* **25**, 140-152 e146, doi:10.1016/j.chom.2018.11.008 (2019).
- 10 Hoang, T. T., Karkhoff-Schweizer, R. R., Kutchma, A. J. & Schweizer, H. P. A broad-host-range Flp-FRT recombination system for site-specific excision of chromosomally-located DNA sequences: application for isolation of unmarked *Pseudomonas aeruginosa* mutants. *Gene* **212**, 77-86, doi:10.1016/s0378-1119(98)00130-9 (1998).
- 11 Cianfanelli, F. R., Cunrath, O. & Bumann, D. Efficient dual-negative selection for bacterial genome editing. *BMC Microbiol* **20**, 129, doi:10.1186/s12866-020-01819-2 (2020).
- 12 Choi, K. H. & Schweizer, H. P. mini-Tn7 insertion in bacteria with single attTn7 sites: example *Pseudomonas aeruginosa*. *Nat Protoc* **1**, 153-161, doi:10.1038/nprot.2006.24 (2006).
- 13 Hoang, T. T., Kutchma, A. J., Becher, A. & Schweizer, H. P. Integration-proficient plasmids for *Pseudomonas aeruginosa*: site-specific integration and use for engineering of reporter and expression strains. *Plasmid* **43**, 59-72, doi:10.1006/plas.1999.1441 (2000).
- 14 Braun, V. FhuA (TonA), the career of a protein. *J Bacteriol* **191**, 3431-3436, doi:10.1128/JB.00106-09 (2009).
- 15 Wright, R. C. T., Friman, V. P., Smith, M. C. M. & Brockhurst, M. A. Cross-resistance is modular in bacteria-phage interactions. *PLoS Biol* **16**, e2006057, doi:10.1371/journal.pbio.2006057 (2018).
- 16 Gallet, R., Lenormand, T. & Wang, I. N. Phenotypic stochasticity protects lytic bacteriophage populations from extinction during the bacterial stationary phase. *Evolution* **66**, 3485-3494, doi:10.1111/j.1558-5646.2012.01690.x (2012).
